# Supplementary material for: Split-type photoelectrochemical immunoassay for sensitive quantification of carcinoembryonic antigen based on target-induced in situ formation of Z-type heterojunction
Source: Royal Society of Chemistry journal article supplement (doi:10.1039/d4ay00248b), 2024-01-01
Supplement: d4ay00248b1.pdf [file d4ay00248b1.pdf]

## Electronic Supplementary Information

### **Split-type photoelectrochemical immunoassay for sensitive quantification of carcinoembryonic antigen based on target-induced in-situ formation of Z-type heterojunction**

Jianhui Zhang,<sup>a</sup> Meirong Tan,<sup>a</sup> Qian Chen,<sup>a</sup> Kangyao Zhang,<sup>\*a</sup> Qian Zhou,<sup>\*b</sup> Wenqiang Lai<sup>c</sup> and  
Dianping Tang<sup>d</sup>

<sup>a</sup> School of Advanced Manufacturing, Fuzhou University, Jinjiang 362200, People's Republic of China

<sup>b</sup> Henan International Joint Laboratory of Medicinal Plants Utilization, College of Chemistry and Molecular Sciences, Henan University, Kaifeng 475000, People's Republic of China

<sup>c</sup> Key Laboratory of Modern Analytical Science and Separation Technology of Fujian Province, Key Laboratory of Pollution Monitoring and Control of Fujian Province, College of Chemistry, Chemical Engineering and Environment, Minnan Normal University, Zhangzhou 363000, People's Republic of China

<sup>d</sup> Key Laboratory of Analysis and Detection for Food Safety (Ministry of Education & Fujian Province), Institute of Nanomedicine and Nanobiosensing, Department of Chemistry, Fuzhou University, Fuzhou 350108, People's Republic of China

## EXPERIMENTAL SECTION

**Material and reagent.** CEA antigen (D111404), CEA antibody (D19400, cAb), CEA antibody (D194003, dAb), and 96-well microtiter plate were acquired from Sangon Biotech Co., Ltd. (Shanghai, China). Zinc chloride ( $\text{ZnCl}_2$ ), indium chloride ( $\text{InCl}_3$ ), and thioacetamide (TAA) were purchased from Aladdin (Shanghai, China). Gold(III) chloride trihydrate ( $\text{HAuCl}_4 \cdot 3\text{H}_2\text{O}$ ), silver nitrate ( $\text{AgNO}_3$ ), sodium borohydride ( $\text{NaBH}_4$ ), and bovine serum albumin (BSA) were acquired from Sinopharm Chemical Reagent Co., Ltd. (Shanghai, China). All other reagents were used as received without further purification.

**Apparatus.** Scanning electron microscopy (SEM; SU8100, Hitachi Instruments, Japan), transmission electron microscopy (TEM; Tecnai G2 F20, FEI Co., USA), X-ray photoelectron spectroscopy (XPS; Scientific ESCALAB 250, USA), and UV-visible diffuse reflectance spectrum (DRS; Cary 7000, Agilent Technologies, Inc) were used to characterize the as-prepared materials in this work. All photoelectrochemical measurement processes were performed on a CHI760E electrochemical workstation (Chenhua Instruments, China).

**Synthesis of  $\text{ZnIn}_2\text{S}_4$  nanoflower and gold nanoparticles-decorated  $\text{ZnIn}_2\text{S}_4$  nanocomposites.** The hierarchical  $\text{ZnIn}_2\text{S}_4$  was synthesized by a solvothermal treatment according to previous literature.<sup>1</sup> Initially,  $\text{ZnCl}_2$  (10 mmol),  $\text{InCl}_3$  (20 mmol) and TAA (80 mmol) were added sequentially into 50-mL deionized water. After forming a homogeneous solution under continuous stirring, it was poured into a Teflon-lined stainless-steel autoclave of 100 mL capacity and heated at 160 °C for 6 h. After natural cooling, the samples were washed several times with deionized water and ethanol and then placed in a drying oven at 60 °C for 8 h.

Next, gold nanoparticles-functionalized  $\text{ZnIn}_2\text{S}_4$  (AuNPs/ $\text{ZnIn}_2\text{S}_4$ ) nanocomposites were obtained based on the  $\text{NaBH}_4$ -reducing method. In brief, 100 mg of the as-prepared  $\text{ZnIn}_2\text{S}_4$  powder was dispersed in 20 mL of  $\text{H}_2\text{O}$  and ultrasonicated for 50 min. Thereafter,  $\text{HAuCl}_4$  aqueous solution (2.0 mL, 20 mM) was quickly added to the solution. After being stirred in the dark overnight, a freshly prepared  $\text{NaBH}_4$  solution (10 mL, 20 mM) was added dropwise into the above mixture, and the reaction proceeded under vigorous stirring for 3 h. Upon completion of the reaction, the product was collected by centrifugation, washed several times with water and ethanol, and finally dried at 50 °C.

**Synthesis of silver nanoparticles and immunoprobe bioconjugates.** Silver nanoparticles (AgNPs) were prepared as follows according to the literature.<sup>2</sup> Initially, 10 mL of 1.0 mM AgNO<sub>3</sub> aqueous solution was slowly dropped into 30 mL NaBH<sub>4</sub> aqueous solution (2.0 mM) under vigorous stirring in an ice bath. Then, the mixture was continuously stirred until the color turned from bright yellow to brownish yellow, and the temperature of the solution rose to room temperature. Finally, the obtained silver colloids were stored at 4 °C in darkness for further use.

The synthetic process of detection antibody-AgNPs conjugates was as follows.<sup>3</sup> Before labeling, AgNPs were adjusted to pH 9.0-9.5 by using Na<sub>2</sub>CO<sub>3</sub> solution to avoid precipitation upon protein introduction. After that, the detection antibody (200 μL, 0.5 mg mL<sup>-1</sup>) was injected into the above AgNPs solution (2.0 mL). Then, the resulting suspension was incubated overnight at 4 °C under the gently shaking condition. Afterwards, the mixture was centrifuged, and the obtained precipitate, dAb-AgNPs, was dispersed in 2.0 mL of PBS (pH 7.4) containing 1.0 wt% BSA and 0.5 wt% Tween 20.

**Preparation of capture antibody-coated microplate.** Prior to the immunoreaction, a capture antibody-coated microplate was prepared by injecting 50 μL of cAb (10 μg mL<sup>-1</sup>) into a blank 96-well microplate. After being incubated overnight at 4 °C, the wells were washed three times by using PBS. Then, 300 μL of blocking buffer (10 mM PBS containing 1.0 wt% BSA, pH 7.4) for 60 min at 37 °C to eliminate the nonspecific adsorption. Following washing three times with PBS, the cAb-coated microplate was obtained and stored in a 4 °C refrigerator for further use.

**Preparation of AuNPs/ZnIn<sub>2</sub>S<sub>4</sub>-modified FTO electrode.** Primarily, the FTO glass electrode was ultrasonically cleaned in water, ethanol, and water in sequence, and then was dried at 60 °C. Next, 30 μL of AuNPs/ZnIn<sub>2</sub>S<sub>4</sub> suspension (1.0 mg mL<sup>-1</sup>, dispersed in water) was dropped onto the FTO with a fixed area of 0.28 cm<sup>2</sup>, and dried in an oven at 50 °C.

**Photoelectrochemical (PEC) measurement.** The PEC measurements were carried out in 0.1 M Na<sub>2</sub>SO<sub>4</sub> under the irradiation of a 300 W Xe lamp (PLS-SXE300, Perfectlight, Beijing, China) on an electrochemical workstation with a classical three-electrode system including a modified FTO working electrode, a Pt-wire counter electrode, and a saturated calomel reference (SCE) electrode. The constant potential was set at 0 V, and current-time (i-t) curve method was used in the whole PEC experiments.

## ADDITIONAL RESULTS AND DISCUSSION

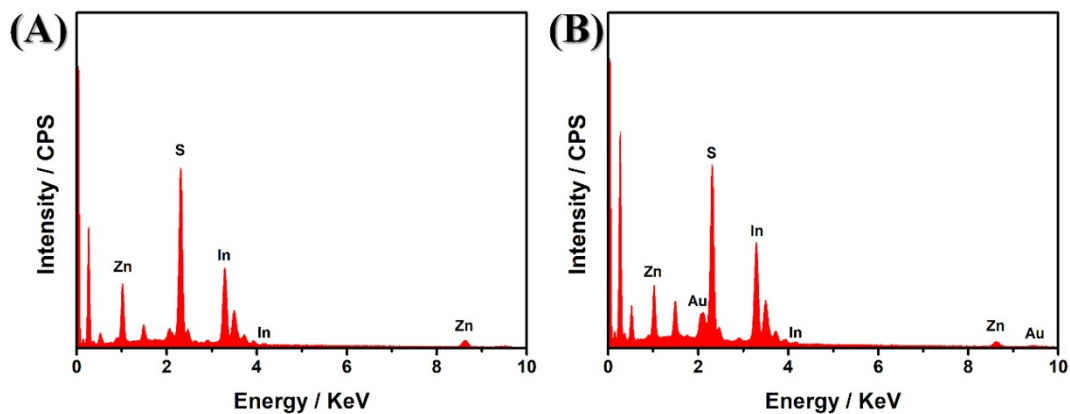

**Fig. S1.** EDS spectrum of (A) pure  $\text{ZnIn}_2\text{S}_4$  sample and (B)  $\text{AuNPs/ZnIn}_2\text{S}_4$  nanohybrids.

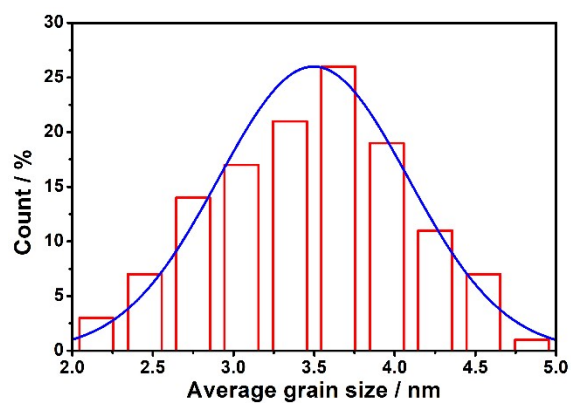

**Fig. S2.** Grain size distribution measured from inset of Fig. 1G by Nano measurer 1.2.

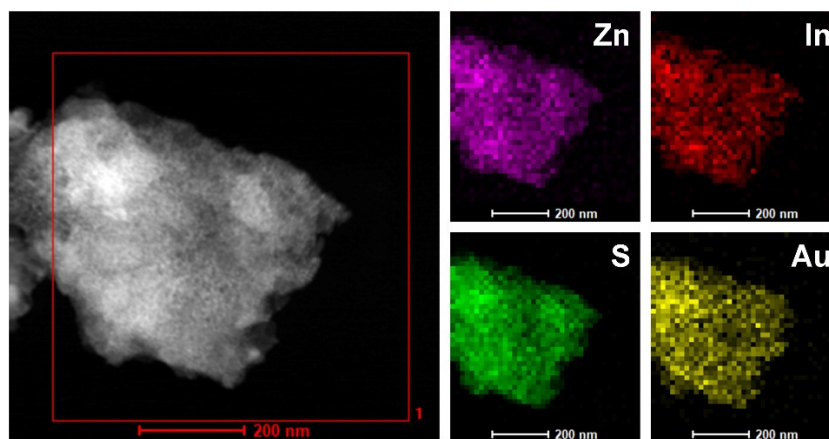

**Fig. S3.** EDS elemental mapping of  $\text{AuNPs/ZnIn}_2\text{S}_4$ .

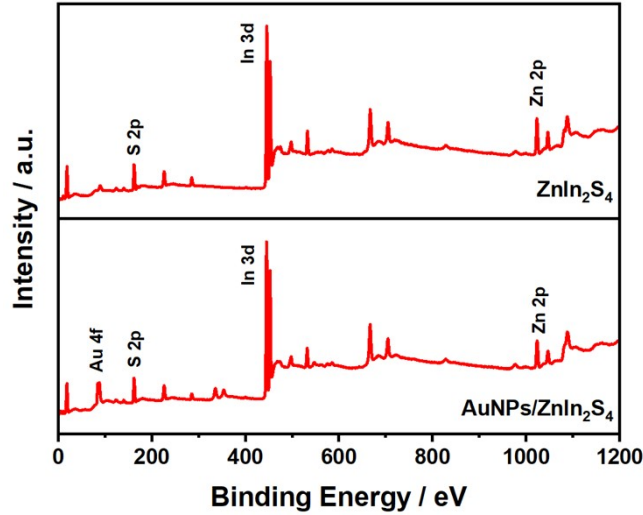

Fig. S4. The full XPS spectra of ZnIn<sub>2</sub>S<sub>4</sub> and AuNPs/ZnIn<sub>2</sub>S<sub>4</sub> samples.

The band gaps of these as-prepared materials were acquired through  $(\alpha h\nu)^2$ - $h\nu$  relation fitting according to UV-DRS plots, which could be estimated from the equation:  $(\alpha h\nu)^2 = A (h\nu - E_g)$ , where  $\alpha$ ,  $h$ ,  $\nu$ ,  $A$ , and  $E_g$  are the absorption coefficient, Planck constant, light frequency, the constant, and band gap energy, respectively.

The valence band and conduction band potentials of synthesized samples were calculated according to the following empirical formulas (1) and (2):

$$E_{CB} = \chi + E_c - E_g/2 \dots\dots\dots (1)$$

$$E_{VB} = E_{CB} + E_g \dots\dots\dots (2)$$

Where  $E_c$  is a constant relative to a standard H electrode,  $E_c = -4.5$  eV; and  $\chi$  is the geometric mean of the absolute electronegativity of the atoms in the semiconductor, the  $\chi$  values of ZnIn<sub>2</sub>S<sub>4</sub> and Ag<sub>2</sub>S are 4.86 eV and 3.94 eV, respectively.<sup>4</sup>

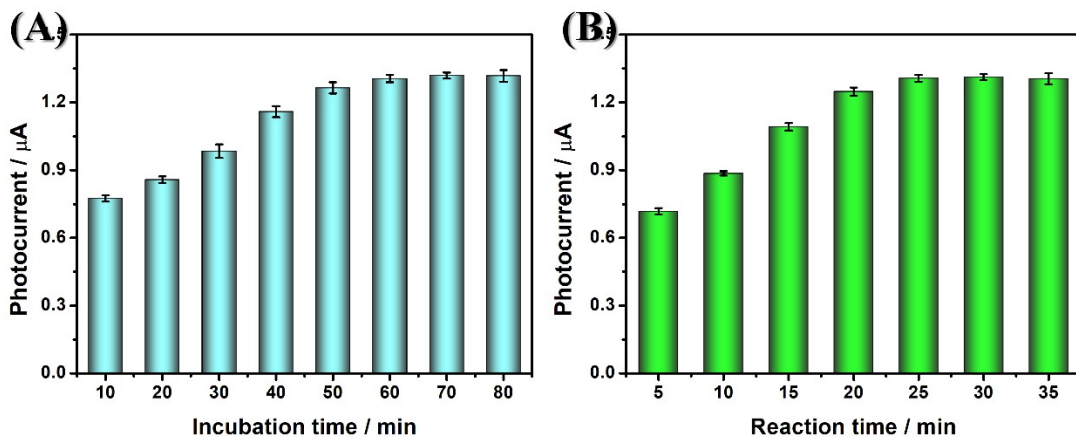

Fig. S5. Influence of (A) incubation time of the CEA antigen-antibody and (B) the ion-exchange reaction time on the photocurrent of PEC biosensor (1.0 ng mL<sup>-1</sup> CEA used in all cases).

**Table S1** Comparison of analytical properties of different methods toward target CEA

| Method                            | Materials                                        | Linear range                    | LOD                        | Reference |
|-----------------------------------|--------------------------------------------------|---------------------------------|----------------------------|-----------|
| Fluorescence                      | Carbon Dots                                      | 0.5 - 1 ng mL <sup>-1</sup>     | 0.3 ng mL <sup>-1</sup>    | 5         |
| Fluorescence                      | FeO <sub>x</sub> @C@CS                           | 0.05 - 7.5 pg mL <sup>-1</sup>  | 0.025 pg mL <sup>-1</sup>  | 6         |
| Enzyme linked immunosorbent assay | -                                                | 0.5 - 60 ng mL <sup>-1</sup>    | 174 pg mL <sup>-1</sup>    | 7         |
| Electrochemistry                  | Fe <sub>3</sub> O <sub>4</sub> @SiO <sub>2</sub> | 0.001 - 80 ng mL <sup>-1</sup>  | 0.0002 ng mL <sup>-1</sup> | 8         |
| Electrochemistry                  | CSH                                              | 0.1 pg - 80 ng mL <sup>-1</sup> | 0.03 pg mL <sup>-1</sup>   | 9         |
| Electrochemistry                  | Cu-Au/CNTs-CSs                                   | 0.025 - 25 ng mL <sup>-1</sup>  | 0.5 pg mL <sup>-1</sup>    | 10        |
| Colorimetric                      | Cu <sub>2</sub> O/Pt nanoparticles               | 0.1 - 80 ng mL <sup>-1</sup>    | 0.026 ng mL <sup>-1</sup>  | 11        |
| Colorimetric                      | MoS <sub>2</sub>                                 | 0.001 - 10 ng mL <sup>-1</sup>  | 0.11 pg mL <sup>-1</sup>   | 12        |
| Chemiluminescence                 | Fe <sub>3</sub> O <sub>4</sub> @SiO <sub>2</sub> | 0.01 - 20 ng mL <sup>-1</sup>   | 3.0 pg mL <sup>-1</sup>    | 13        |
| Surface enhanced Raman scattering | Gold nanoparticles                               | 0.005 - 2 ng mL <sup>-1</sup>   | 20 pg mL <sup>-1</sup>     | 14        |
| Surface enhanced Raman scattering | Gold nanostars                                   | 0.1 - 500 ng mL <sup>-1</sup>   | 0.05 ng mL <sup>-1</sup>   | 15        |
| CVG-AFS/ICP-MS                    | CdTe                                             | 0.5 - 20 ng mL <sup>-1</sup>    | 0.2 ng mL <sup>-1</sup>    | 16        |
| Photoelectrochemistry             | AuNPs/ZnIn <sub>2</sub> S <sub>4</sub>           | 0.01 - 20 ng mL <sup>-1</sup>   | 7.3 pg mL <sup>-1</sup>    | This work |

FeO<sub>x</sub>@C@CS: monodisperse spindle-like magnetic copper silicate; CSH: copper silicate hollow spheres; CNTs: Carbon nanotubes; CSs: carbon spheres; CVG-AFS/ICP-MS: chemical vapor generation-atomic fluorescence spectrometry/inductively coupled plasma-mass spectrometry.

## References

1. N. Q. Yang and J. Li, *Opt. Mater.*, 2021, **115**, 111040.
2. Z. Lin, S. Lv, K. Zhang and D. Tang, *J. Mater. Chem. B*, 2017, **5**, 826-833.
3. L. Zhu, Z. Yin, Z. Lv, M. Li and D. Tang, *Analyst*, 2021, **146**, 4487-4494.
4. R. Wang, L. Zhao, L. Li, Q. Song and J. Huang, *J. Phys. Chem. Solids*, 2020, **136**, 109148.
5. H. Miao, L. Wang, Y. Zhuo, Z. Zhou and X. Yang, *Biosens. Bioelectron.*, 2016, **86**, 83-89.
6. Y. Jin, J. Zheng, Y. Ci, L. Zhu, M. Zhang and X. Yin, *Talanta*, 2024, **266**, 125012.
7. D. Lin, B. Li, L. Fu, J. Qi, C. Xia, Y. Zhang, J. Chen, J. Choo and L. Chen, *Microsyst. Nanoeng.*, 2022, **8**, 53.
8. T. Feng, X. Qiao, H. Wang, Z. Sun and C. Hong, *Biosens. Bioelectron.*, 2016, **79**, 48-54.
9. Y. Song, W. Li, C. Ma, Y. Sun, J. Qiao, H. Li and C. Hong, *Sens. Actuators B Chem.*, 2020, **319**, 128311.
10. D. Tran, V. H. Hoa, L. Tuan, N. Kim and J. Lee, *Biosens. Bioelectron.*, 2018, **119**, 134-140.

11. X. Wang, X. Liao, L. Mei, M. Zhang, S. Chen, X. Qiao and C. Hong, *Sens. Actuators B Chem.*, 2021, **341**,130032.
12. Y. Park, B. Ryu, S. J. Ki, X. Liang and K. Kurabayashi, *Adv. Mater. Inter.*, 2021, **8**, 2101291.
13. S. Liu, J. Li, Y. Zou, Y. Jiang, L. Wu and Y. Deng, *Small*, 2023, **19**, 2304631.
14. X. Bai, L. Wang, J. Ren, X. Bai, L. Zeng, A. Shen and J. Hu, *Anal. Chem.*, 2019, **91**, 2955-2963.
15. M. Li, J. Kang, S. Sukumar, R. Dasari and I. Barman, *Chem. Sci.*, 2015, **6**, 3906-3914.
16. P. Chen, K. Huang, R. Dai, E. Sawyer, K. Sun, B. Ying, X. Wei and J. Geng, *Analyst*, 2019, **144**, 2797-2802.
